# Supplementary material
Source: PubMed Central journal article supplement (PMC3408156)
Supplement: supp_M112.348128_jbc.M112.348128-1.pdf [file supp_M112.348128_jbc.M112.348128-1.pdf]

Supplemental Figure 1. Kim et al.

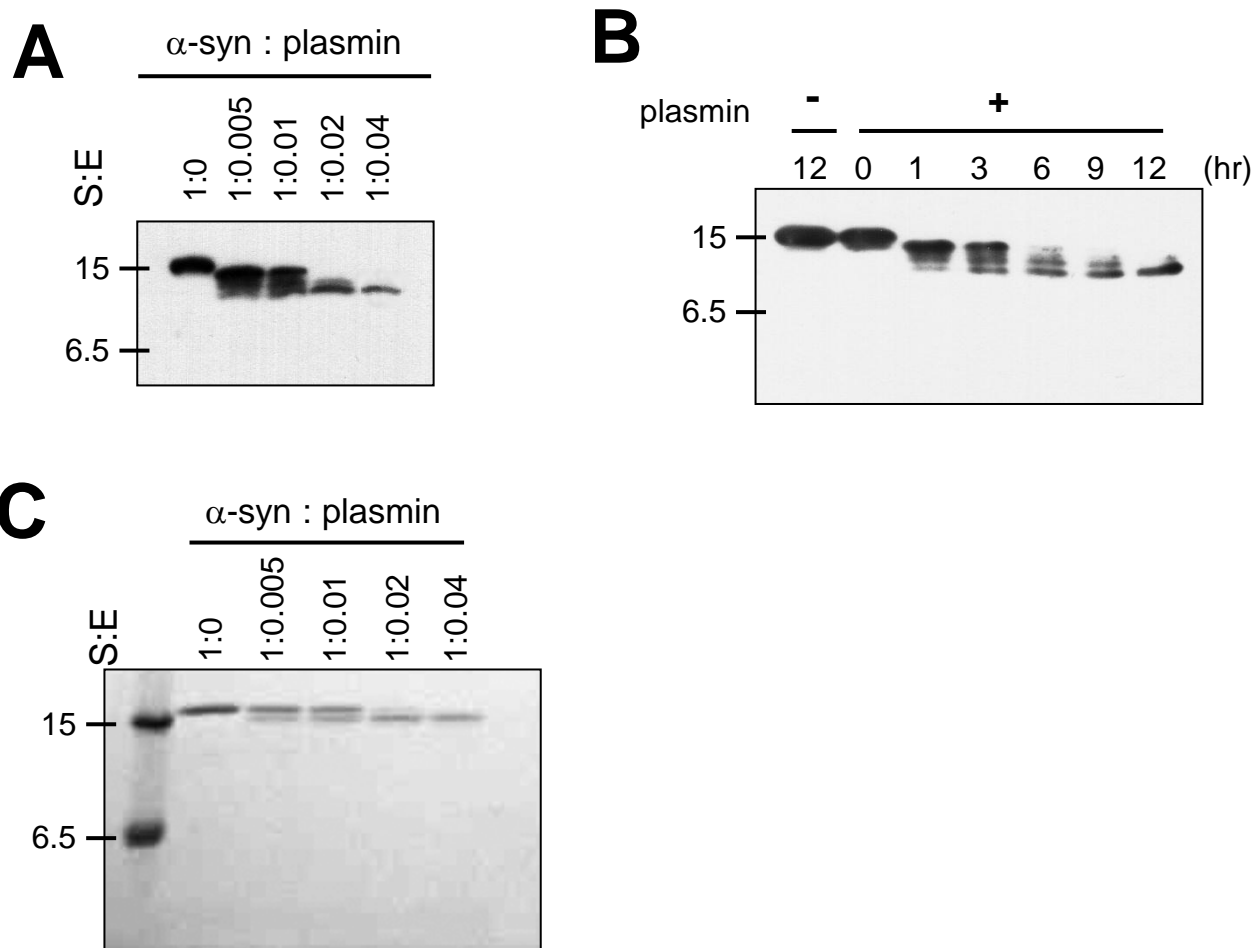

## Supplemental Figure 1 Legend

Plasmin-derived  $\alpha$ -syn fragments are detected by an  $\alpha$ -syn antibody which detects the C-terminal region of  $\alpha$ -syn or Coomassie Blue staining. A. After incubation of 1.735  $\mu$ M  $\alpha$ -syn with plasmin at the indicated molar ratios for 12 hr at 37°C, (B) after incubation of 1.735  $\mu$ M  $\alpha$ -syn with plasmin at the 1:0.04 molar ratio for the indicated times at 37°C, the samples were loaded into SDS-PAGE gels, then Western blots for  $\alpha$ -syn (Santa Cruz Biotechnology, Santa Cruz, CA) were performed. C. After incubation of 1.735  $\mu$ M  $\alpha$ -syn with plasmin at the indicated molar ratios for 12 hr at 37°C, the samples were loaded into SDS-PAGE gels, then Coomassie Blue staining was performed.

## Supplemental Table I. Observed peptides by LC/MS/MS analysis

| sequence                                               | Observed<br>molecular<br>mass (Da) | Theoretical<br>Molecular<br>mass (Da) | Possible<br>sequence<br>matches |
|--------------------------------------------------------|------------------------------------|---------------------------------------|---------------------------------|
| AKEGVVAAAEK                                            | 1071.63                            | 1071.59                               | 11-21                           |
| AKEGVVAAAEKTK                                          | 1300.80                            | 1300.73                               | 11-23                           |
| AKEGVVAAAEKTKQGVAEAAGK                                 | 2112.25                            | 2112.15                               | 11-33                           |
| TKEGVLYVGSK                                            | 1179.67                            | 1179.64                               | 33-43                           |
| TKEGVVHGVATVAEKT                                       | 1753.06                            | 1752.97                               | 44-60                           |
| TKEGVVHGVATVAEKTKEQVTNVGGAVVTGVTAVAQK                  | 3662.18                            | 3662.00                               | 46-80                           |
| TKEGVVHGVATVAEKTKEQVTNVGGAVVTGVTAVAQKTVEGAGSIAAATGFVKK | 5251.16                            | 5249.86                               | 46-97                           |
| EGVVHGVATVAEK                                          | 1294.72                            | 1294.68                               | 46-58                           |
| EGVVHGVATVAEKT                                         | 1505.90                            | 1505.82                               | 46-60                           |
| EGVVHGVATVAEKTKEQVTNVGGAVVTGVTAVAQK                    | 3433.04                            | 3432.85                               | 46-80                           |
| EGVVHGVATVAEKTKEQVTNVGGAVVTGVTAVAQKTVEGAGSIAAATGFVKK   | 5021.03                            | 5022.68                               | 46-97                           |
| TKEQVTNVGGAVVTGVTAVAQK                                 | 2156.25                            | 2156.18                               | 59-80                           |
| TKEQVTNVGGAVVTGVTAVAQKTVEGAGSIAAATGFVKK                | 3744.24                            | 3744.04                               | 59-97                           |
| EQVTNVGGAVVTGVTAVAQK                                   | 1927.11                            | 1927.03                               | 61-80                           |
| TVEGAGSIAAATGFVK                                       | 1477.81                            | 1477.77                               | 81-97                           |
| TVEGAGSIAAATGFVKK                                      | 1605.91                            | 1605.87                               | 81-98                           |
| DQLGKNEEGAPQEGILEDMPVDPDNEAYEMPSEEGYQDYEPEA            | 4844.23                            | 4843.99                               | 98-140                          |
